# Supplementary material
Source: PubMed Central journal article supplement (PMC8060899)
Supplement: NIHMS1687973-supplement-Supplement.pdf [file NIHMS1687973-supplement-Supplement.pdf]

Supplementary Table S1. Detailed definition of covariates

| Patient-level variables                             | Definition                                                                                                                                                                                                                                                                                                                                       | Data Source                                                             |
|-----------------------------------------------------|--------------------------------------------------------------------------------------------------------------------------------------------------------------------------------------------------------------------------------------------------------------------------------------------------------------------------------------------------|-------------------------------------------------------------------------|
| Age                                                 | The beneficiary's age in years as of the end of the calendar year or for beneficiaries who died during the year, age as of the date of death (AGE_AT_END_REF_YR)                                                                                                                                                                                 | MBSF                                                                    |
| Sex                                                 | The sex of the beneficiary (Male, Female) (SEX_IDENT_CD)                                                                                                                                                                                                                                                                                         | MBSF                                                                    |
| Race/Ethnicity                                      | Beneficiary race code measured through RTI algorithm, which enhanced race/ethnicity designation based on first and last name algorithms (NH Whites, Black, Hispanics, Others , missing) (RTI_RACE_CD)                                                                                                                                            | MBSF                                                                    |
| Comorbid conditions                                 | Individual Charlson comorbid conditions with at least one inpatient claim or two different physician or outpatient claims that are more than 30 days apart ( <a href="https://healthcaredelivery.cancer.gov/seermedicare/considerations/macro-2014.html">https://healthcaredelivery.cancer.gov/seermedicare/considerations/macro-2014.html</a> ) | Medpar, Outpatient, Carrier                                             |
| Dual eligibility                                    | Ever Medicare-Medicaid dual eligible in 2017 (DUAL_STUS_CD_01-DUAL_STUS_CD_12: full – '02','04', '08' or partial – '01','03','05','06')                                                                                                                                                                                                          | MBSF                                                                    |
| Original reason for entitlement                     | Original reason for Medicare entitlement (age, disability, ESRD, or disability+ESRD)(ENTLMT_RSN_ORIG)                                                                                                                                                                                                                                            | MBSF                                                                    |
| Medical Care Utilization in 2016                    |                                                                                                                                                                                                                                                                                                                                                  |                                                                         |
| # Hospitalizations                                  | Number of hospitalization discharge (NCH_CLM_TYPE_CD='60')                                                                                                                                                                                                                                                                                       | Medpar                                                                  |
| # ED visits                                         | Number of outpatient ED visits (associated with revenue center codes REV_CNTR 045X and 0981)                                                                                                                                                                                                                                                     | Outpatient                                                              |
| # ICU stays                                         | Number of hospitalization with ICU stay.(associated with NCH_CLM_TYPE_CD='60' inpatient claims and ICU_IND_CD between '0'-9')                                                                                                                                                                                                                    | Medpar                                                                  |
| # Home-away days                                    | Number of inpatient days and SNF days in 2016                                                                                                                                                                                                                                                                                                    | Medpar                                                                  |
| # Home Health Service episodes                      | Number of HHA episodes (associated with revenue center codes 042X, 043X, 044X, 055X, 056X, 057X, 058X, and 059X).                                                                                                                                                                                                                                | HHA                                                                     |
| # SNF stays                                         | Number of SNF stay (associated with NCH_CLM_TYPE_CD='20' or '30' or SS_LS_SNF_IND_CD='N'). We excluded SNF claims missed both admission date or discharge date (2908 claims).                                                                                                                                                                    | Medpar                                                                  |
| <b>Regional-level variables (HRR)</b>               | HRR assigned based on beneficiaries' residence                                                                                                                                                                                                                                                                                                   |                                                                         |
| Hospitals beds per 1,000 beneficiaries              | Measured by sum of AHA beds (Dartmouth Hospital Track File 2016) over number of 65+ Medicare beneficiaries by HRR (CMS geographic public-use file 2016)                                                                                                                                                                                          | CMS geographic public-use file 2017; Dartmouth Hospital Track File 2016 |
| Emergency department visits per 1,000 beneficiaries | Emergency Department Visits per 1000 65+ beneficiaries by HRR                                                                                                                                                                                                                                                                                    | CMS geographic public-use file 2017                                     |
| % beneficiaries using hospice                       | % beneficiaries using hospice by HRR                                                                                                                                                                                                                                                                                                             | CMS geographic public-use file 2017                                     |

|                               |                                      |                                     |
|-------------------------------|--------------------------------------|-------------------------------------|
| Standardized per capita costs | Standardized per capita costs by HRR | CMS geographic public-use file 2017 |
|-------------------------------|--------------------------------------|-------------------------------------|

Supplementary Table S2. Demographic, clinical and regional characteristics of the total population and of those died within the first three months of 2017 and those who did not die within the first three months of 2017

|                                                                   | Total           | Early Death     | No early death    |                    |
|-------------------------------------------------------------------|-----------------|-----------------|-------------------|--------------------|
|                                                                   | N (row%)        | N (row%)        | N (row%)          |                    |
|                                                                   | N=1323331 (100) | N=13970 (1.06)  | N=1309361 (98.94) |                    |
|                                                                   | N (col%)        | N (col%)        | N (col%)          | Chi-square p value |
| ACP in 2017                                                       | 32137 (2.4)     | 539 (3.9)       | 31598 (2.4)       | <.0001             |
| No ACP in 2017                                                    | 1291194 (97.6)  | 13431 (96.1)    | 1277763 (97.6)    |                    |
| <b>Patient Level</b>                                              | Mean (SD)       | Mean (SD)       | Mean (SD)         | T test p value     |
| Age                                                               | 76.1 (7.7)      | 82.3 (9.1)      | 76.0 (7.6)        | <.0001             |
| Sex                                                               | N (col%)        | N (col%)        | N (col%)          | Chi-square p value |
| Male                                                              | 602695 (45.5)   | 6717 (48.1)     | 595978 (45.5)     | <.0001             |
| Female                                                            | 720636 (54.5)   | 7253 (51.9)     | 713383 (54.5)     |                    |
| Race/Ethnicity                                                    |                 |                 |                   |                    |
| NH White                                                          | 1078540 (81.5)  | 11677 (83.6)    | 1066863 (81.5)    | <.0001             |
| Black                                                             | 97517 (7.4)     | 1165 (8.3)      | 96352 (7.4)       |                    |
| Hispanics                                                         | 69602 (5.3)     | 643 (4.6)       | 68960 (5.3)       |                    |
| Others                                                            | 56818 (4.3)     | 421 (3.0)       | 56397 (4.3)       |                    |
| Unknown                                                           | 20854 (1.6)     | 65 (0.5)        | 20789 (1.6)       |                    |
| Dual Eligibility                                                  | 155091 (11.7)   | 3516 (25.2)     | 151575 (11.6)     | <.0001             |
| Original Medicare Eligible Reason                                 |                 |                 |                   |                    |
| old age                                                           | 1207753 (91.3)  | 12090 (86.5)    | 1195663 (91.3)    | <.0001             |
| disability                                                        | 113342 (8.6)    | 1785 (12.8)     | 111557 (8.5)      |                    |
| ESRD                                                              | 1286 (0.1)      | 51 (0.4)        | 1235 (0.1)        |                    |
| both disability and ESRD                                          | 950 (0.1)       | 44 (0.3)        | 906 (0.1)         |                    |
| Medical Care Utilization in 2016                                  | Mean (SD)       | Mean (SD)       | Mean (SD)         | T test p value     |
| # hospitalization                                                 | 0.22 (0.7)      | 1.04 (1.6)      | 0.21 (0.7)        | <.0001             |
| # ED visits                                                       | 0.34 (0.9)      | 0.92 (1.8)      | 0.33 (0.9)        | <.0001             |
| # ICU visits                                                      | 0.06 (0.3)      | 0.32 (0.8)      | 0.05 (0.3)        | <.0001             |
| # HHA episode                                                     | 0.15 (0.7)      | 0.66 (1.3)      | 0.15 (0.7)        | <.0001             |
| # SNF stays                                                       | 0.05 (0.3)      | 0.4 (0.9)       | 0.05 (0.3)        | <.0001             |
| # Home-away days                                                  | 1.54 (15.3)     | 10 (11.4)       | 1.42 (1.5)        | <.0001             |
| Charlson Comorbidity Scores                                       | N (col%)        | N (col%)        | N (col%)          | Chi-square p value |
| 0                                                                 | 738947 (55.8)   | 2674 (19.1)     | 736273 (56.2)     | <.0001             |
| 1                                                                 | 205813 (15.6)   | 1787 (12.8)     | 204026 (15.6)     |                    |
| 2+                                                                | 378571 (28.6)   | 9509 (68.1)     | 269062 (28.2)     |                    |
| Comorbid conditions in 2016                                       |                 |                 |                   |                    |
| Acute MI (w/ or w/o history of MI)                                | 12243 (0.9)     | 634 (4.5)       | 11609 (0.9)       | <.0001             |
| History of MI (no Acute MI in 2016)                               | 22136 (1.7)     | 781 (5.6)       | 21355 (1.6)       | <.0001             |
| CHF                                                               | 92797 (7.0)     | 4286 (31.4)     | 88411 (6.8)       | <.0001             |
| PVD                                                               | 109231 (8.3)    | 3776 (27.0)     | 105455 (8.1)      | <.0001             |
| CVD                                                               | 66671 (5.0)     | 2082 (14.9)     | 64589 (4.9)       | <.0001             |
| COPD                                                              | 137676 (10.4)   | 4072 (29.2)     | 133604 (10.2)     | <.0001             |
| Dementia                                                          | 59253 (4.5)     | 3733 (26.7)     | 55520 (4.2)       | <.0001             |
| Paralysis                                                         | 7935 (0.6)      | 411 (2.9)       | 7524 (0.6)        | <.0001             |
| Diabetes                                                          | 138793 (10.5)   | 1624 (11.6)     | 137169 (10.5)     | <.0001             |
| Diabetes w/ complications                                         | 130621 (9.9)    | 3001 (21.5)     | 127620 (9.8)      | <.0001             |
| renal disease                                                     | 116441 (8.8)    | 3994 (28.6)     | 112447 (8.6)      | <.0001             |
| mild liver disease                                                | 15591 (1.2)     | 386 (2.8)       | 15205 (1.2)       | <.0001             |
| moderate/severe liver disease                                     | 2311 (0.2)      | 176 (1.3)       | 2135 (0.2)        | <.0001             |
| ulcers                                                            | 7480 (0.6)      | 296 (2.1)       | 7184 (0.6)        | <.0001             |
| rheum disease                                                     | 43288 (3.3)     | 702 (5.0)       | 42586 (3.3)       | <.0001             |
| aids                                                              | 955 (0.1)       | 13 (0.1)        | 942 (0.1)         | 0.3553             |
| Metastatic solid tumor                                            | 11848 (0.9)     | 964 (6.9)       | 10884 (0.8)       | <.0001             |
| Other cancer                                                      | 90042 (6.8)     | 1656 (11.9)     | 88386 (6.8)       | <.0001             |
| <b>Regional Level (HRR)</b>                                       | Mean (SD)       | Mean (SD)       | Mean (SD)         | T test p value     |
| # Hospital beds per 1000 65+ Medicare beneficiaries               | 15.8 (4.2)      | 16.0 (4.2)      | 15.9 (4.2)        | <.0001             |
| # Emergency Department visits per 1000 65+ Medicare beneficiaries | 589.7 (64.5)    | 594.4 (64.8)    | 589.7 (64.5)      | <.0001             |
| % beneficiaries using hospice                                     | 2.5 (1.5)       | 2.5 (1.5)       | 2.5 (1.5)         | 0.3833             |
| Standardized Per Capita Costs                                     | 9553.5 (1158.8) | 9582.7 (1143.2) | 9553.1 (1158.9)   | 0.0027             |
| # Hospital beds per 1000 65+ Medicare beneficiaries               | N (col%)        | N (col%)        | N (col%)          | Chi-square p value |
| 1st quintile ( $\leq$ 11.9)                                       | 223318 (16.9)   | 2177 (15.6)     | 221141 (16.9)     | 0.0001             |
| 2nd quintile (11.91-14.3)                                         | 313197 (23.7)   | 3266 (23.4)     | 309931 (23.7)     |                    |

|                                                                   |               |             |               |        |
|-------------------------------------------------------------------|---------------|-------------|---------------|--------|
| 3rd quintile (14.31-16.2)                                         | 258217 (19.5) | 2761 (19.8) | 255456 (19.5) |        |
| 4th quintile (16.21-19.5)                                         | 306093 (23.1) | 3294 (23.6) | 302799 (23.1) |        |
| 5th quintile (>19.5)                                              | 222506 (16.8) | 2472 (17.7) | 220034 (16.8) |        |
| # Emergency Department visits per 1000 65+ Medicare beneficiaries |               |             |               |        |
| 1st quintile (≤533)                                               | 303613 (22.9) | 2834 (20.3) | 300779 (23.0) | <.0001 |
| 2nd quintile (534-578)                                            | 287426 (21.7) | 2958 (21.2) | 284468 (21.7) |        |
| 3rd quintile (579-620)                                            | 314874 (23.8) | 3405 (24.4) | 311469 (23.8) |        |
| 4th quintile (621-655)                                            | 232302 (17.6) | 2625 (18.8) | 229677 (17.5) |        |
| 5th quintile (>655)                                               | 185116 (14.0) | 2148 (15.4) | 182968 (14.0) |        |
| % beneficiaries using hospice                                     |               |             |               |        |
| 1st quintile (≤0.0385)                                            | 291819 (22.1) | 3148 (22.5) | 288671 (22.1) | 0.1501 |
| 2nd quintile (0.0386-2.81999)                                     | 244764 (18.5) | 2554 (18.3) | 242210 (18.5) |        |
| 3rd quintile (2.82-3.25)                                          | 318635 (24.1) | 3254 (23.3) | 315381 (24.1) |        |
| 4th quintile (3.26-3.74)                                          | 267588 (20.2) | 2850 (20.4) | 264738 (20.2) |        |
| 5th quintile (>3.74)                                              | 200525 (15.2) | 2164 (15.5) | 198361 (15.2) |        |
| Standardized Per Capita Costs                                     |               |             |               |        |
| 1st quintile (≤\$8319.23)                                         | 199767 (15.1) | 1945 (13.9) | 197822 (15.1) | 0.0004 |
| 2nd quintile (\$8319.24-\$9102.01)                                | 246970 (18.7) | 2623 (18.8) | 244347 (18.7) |        |
| 3rd quintile (\$9102.02-\$9768.95)                                | 283258 (21.4) | 3059 (21.9) | 280199 (21.4) |        |
| 4th quintile (\$9768.96-\$10464.18)                               | 306669 (23.2) | 3365 (24.1) | 303304 (23.2) |        |
| 5th quintile (>\$10464.18)                                        | 286667 (21.7) | 2978 (21.3) | 283689 (21.7) |        |

---

Supplementary Table S3. Multivariate logistic regression predicting receipt of ACP visits among Medicare beneficiaries who did not die within the first three months of 2017

|                                                                   | OR (95% CI)         | p value |
|-------------------------------------------------------------------|---------------------|---------|
| <b>Patient Level</b>                                              |                     |         |
| Age                                                               | 1.027 (1.025-1.028) | <.0001  |
| Sex                                                               |                     |         |
| Male                                                              | 1 (reference)       |         |
| Female                                                            | 1.18 (1.15-1.2)     | <.0001  |
| Race/Ethnicity                                                    |                     |         |
| NH White                                                          | 1 (reference)       |         |
| Black                                                             | 0.84 (0.81-0.88)    | <.0001  |
| Hispanics                                                         | 0.84 (0.8-0.89)     | <.0001  |
| Others                                                            | 0.97 (0.91-1.02)    | 0.2346  |
| Unknown                                                           | 0.79 (0.71-0.89)    | <.0001  |
| Dual Eligibility                                                  |                     |         |
| No                                                                | 1 (reference)       |         |
| Yes                                                               | 1.15 (1.11-1.19)    | <.0001  |
| Original Medicare Eligible Reason                                 |                     |         |
| old age                                                           | 1 (reference)       |         |
| disability                                                        | 1.08 (1.04-1.13)    | <.0001  |
| ESRD                                                              | 1.31 (0.98-1.75)    | 0.0728  |
| both disability and ESRD                                          | 1.25 (0.89-1.77)    | 0.2059  |
| Medical care utilization in 2016                                  |                     |         |
| # Hospitalization                                                 | 1.01 (0.99-1.03)    | 0.4977  |
| # ED visits                                                       | 1.03 (1.03-1.04)    | <.0001  |
| # ICU visits                                                      | 0.97 (0.94-1.01)    | 0.1335  |
| # HHA episode                                                     | 1.09 (1.08-1.1)     | <.0001  |
| # SNF stays                                                       | 1.04 (1.01-1.08)    | 0.0174  |
| # Home away days                                                  | 1 (0.999-1)         | 0.8401  |
| Comorbid conditions in 2016                                       |                     |         |
| Acute MI (w/ or w/o history of MI)                                | 1 (0.91-1.11)       | 0.9327  |
| History of MI (no Acute MI in 2016)                               | 1.06 (0.98-1.14)    | 0.1324  |
| CHF                                                               | 1.2 (1.15-1.25)     | <.0001  |
| PVD                                                               | 1.2 (1.15-1.24)     | <.0001  |
| CVD                                                               | 1.16 (1.11-1.21)    | <.0001  |
| COPD                                                              | 1.33 (1.28-1.37)    | <.0001  |
| Dementia                                                          | 1.17 (1.12-1.23)    | <.0001  |
| Paralysis                                                         | 1.09 (0.97-1.22)    | 0.1565  |
| Diabetes                                                          | 1.22 (1.18-1.26)    | <.0001  |
| Diabetes w/ complications                                         | 1.4 (1.36-1.45)     | <.0001  |
| renal disease                                                     | 1.26 (1.21-1.3)     | <.0001  |
| mild liver disease                                                | 1.17 (1.08-1.28)    | 0.0003  |
| moderate/severe liver disease                                     | 1.68 (1.39-2.04)    | <.0001  |
| ulcers                                                            | 1.04 (0.92-1.17)    | 0.5407  |
| rheum disease                                                     | 1.16 (1.09-1.22)    | <.0001  |
| aids                                                              | 1.07 (0.72-1.57)    | 0.7453  |
| Metastatic solid tumor                                            | 1.89 (1.73-2.07)    | <.0001  |
| Other cancer                                                      | 1.34 (1.29-1.39)    | <.0001  |
| <b>Regional Level</b>                                             |                     |         |
| # Hospital beds per 1000 65+ Medicare beneficiaries               |                     |         |
| 1st quintile (low)                                                | 1 (reference)       |         |
| 2nd quintile                                                      | 0.82 (0.62-1.07)    | 0.1422  |
| 3rd quintile                                                      | 0.77 (0.58-1.02)    | 0.0644  |
| 4th quintile                                                      | 0.77 (0.57-1.04)    | 0.0828  |
| 5th quintile (high)                                               | 0.74 (0.55-1.02)    | 0.0621  |
| # Emergency Department visits per 1000 65+ Medicare beneficiaries |                     |         |
| 1st quintile (low)                                                | 1 (reference)       |         |
| 2nd quintile                                                      | 0.91 (0.7-1.19)     | 0.489   |
| 3rd quintile                                                      | 0.8 (0.61-1.06)     | 0.1167  |
| 4th quintile                                                      | 1.01 (0.76-1.35)    | 0.9262  |
| 5th quintile (high)                                               | 0.64 (0.47-0.87)    | 0.0042  |
| % beneficiaries using hospice                                     |                     |         |
| 1st quintile (low)                                                | 1 (reference)       |         |
| 2nd quintile                                                      | 0.97 (0.75-1.25)    | 0.7843  |
| 3rd quintile                                                      | 0.98 (0.75-1.28)    | 0.887   |
| 4th quintile                                                      | 0.75 (0.57-0.98)    | 0.0316  |
| 5th quintile (high)                                               | 0.74 (0.56-0.98)    | 0.0343  |

Standardized Per Capita Costs

|                     |                  |        |
|---------------------|------------------|--------|
| 1st quintile (low)  | 1 (reference)    |        |
| 2nd quintile        | 1.11 (0.84-1.48) | 0.4627 |
| 3rd quintile        | 1.49 (1.1-2.02)  | 0.0101 |
| 4th quintile        | 1.75 (1.27-2.4)  | 0.0006 |
| 5th quintile (high) | 2.11 (1.5-2.97)  | <.0001 |

---

Supplementary Figure 1. ROC curve for model predicting the odds of receiving ACP services in 2017

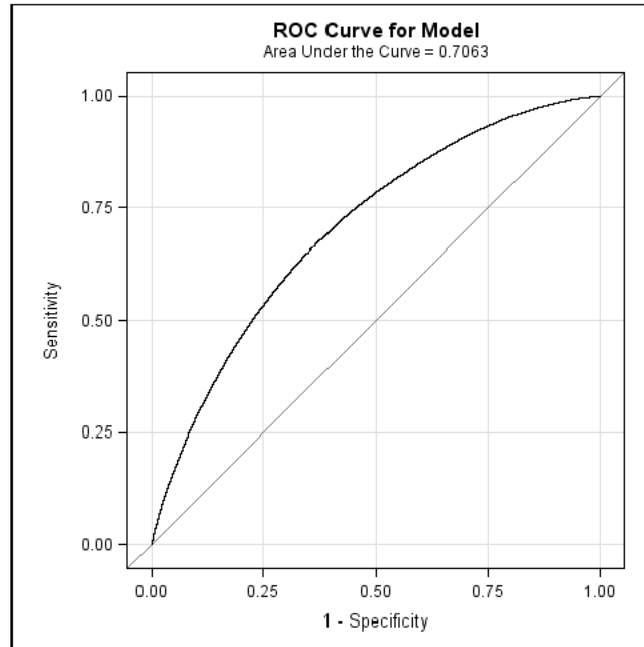

\*ROC: Receiver Operating Characteristic
